# Supplementary material
Source: MDPI journal article supplement (https://www.mdpi.com/2311-7524/9/5/565)
Supplement: s1 [file s1]

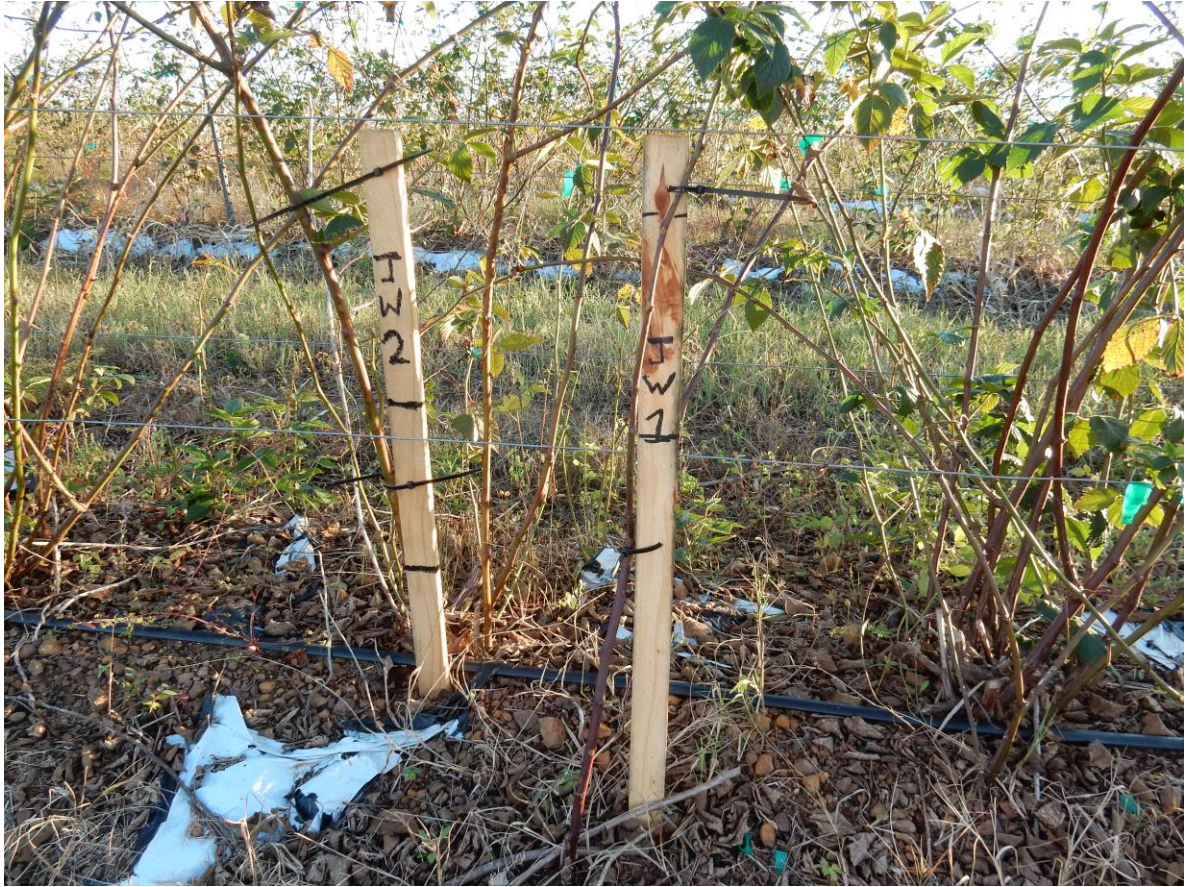

**Figure S1.** Blackberry canes in a commercial blackberry field tied to stakes for bi-weekly imaging of orange cane blotch development.
